# Supplementary material for: SSU rDNA Divergence in Planktonic Foraminifera: Molecular Taxonomy and Biogeographic Implications
Source: PubMed Central journal article supplement (PMC4131912; doi:10.1371/journal.pone.0104641), 2014-08-13

Spinose B

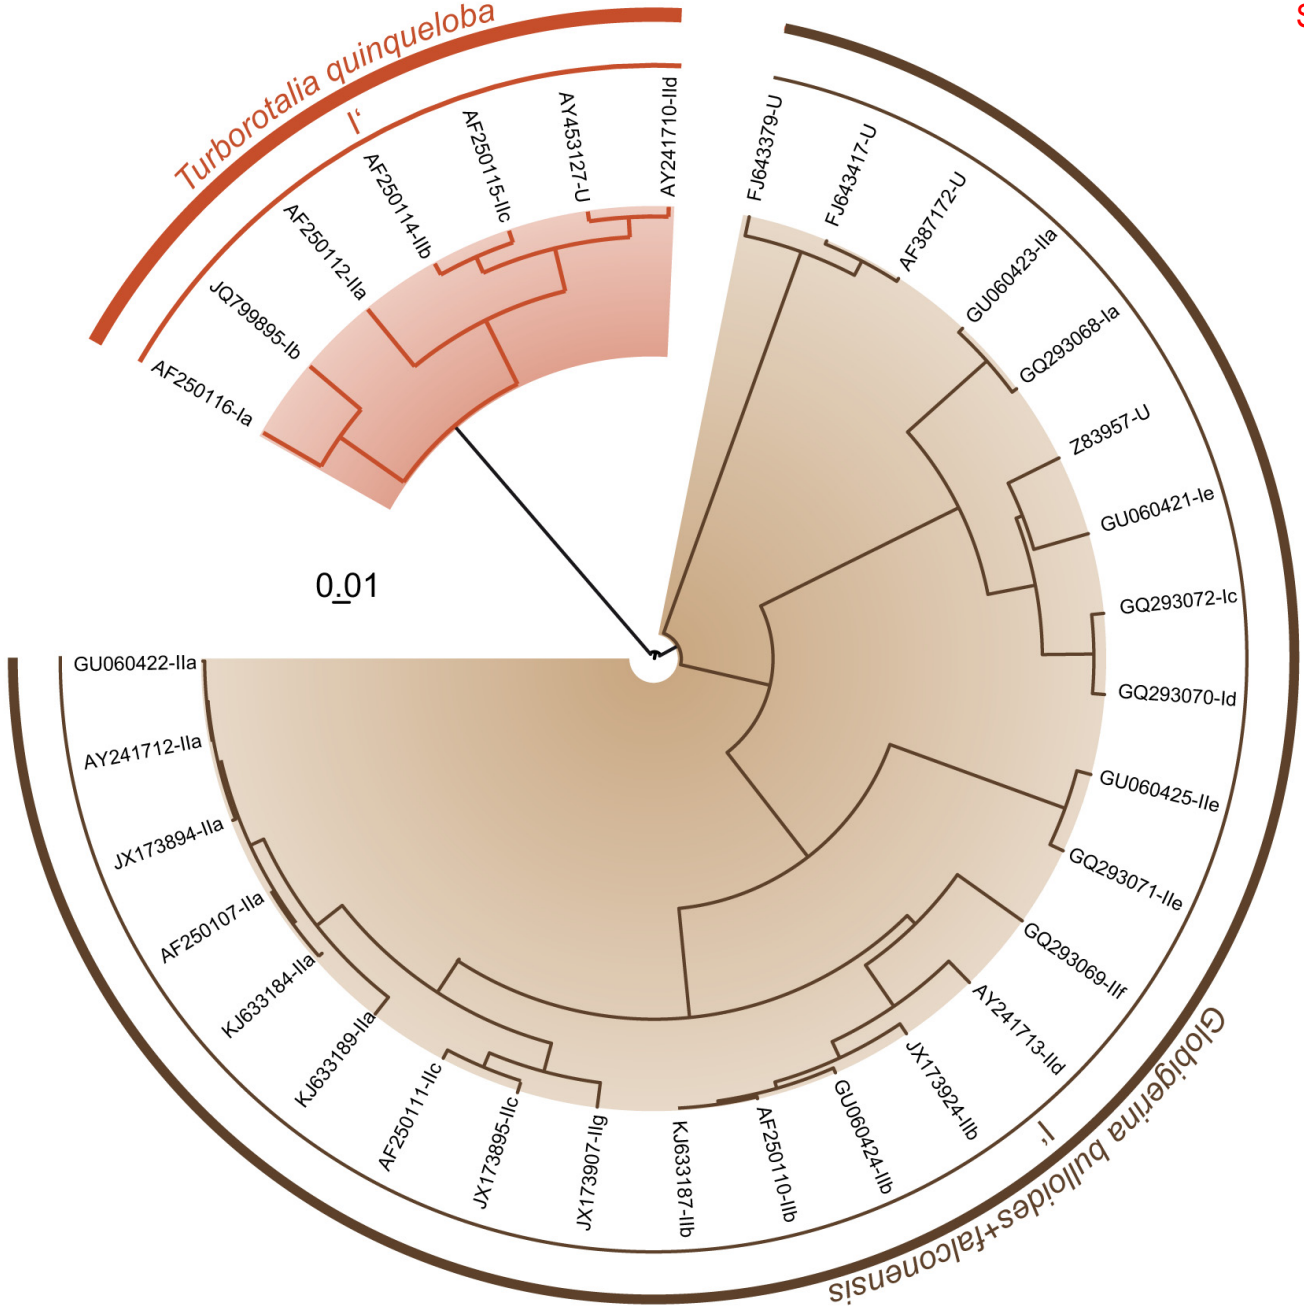

Non-spinose A

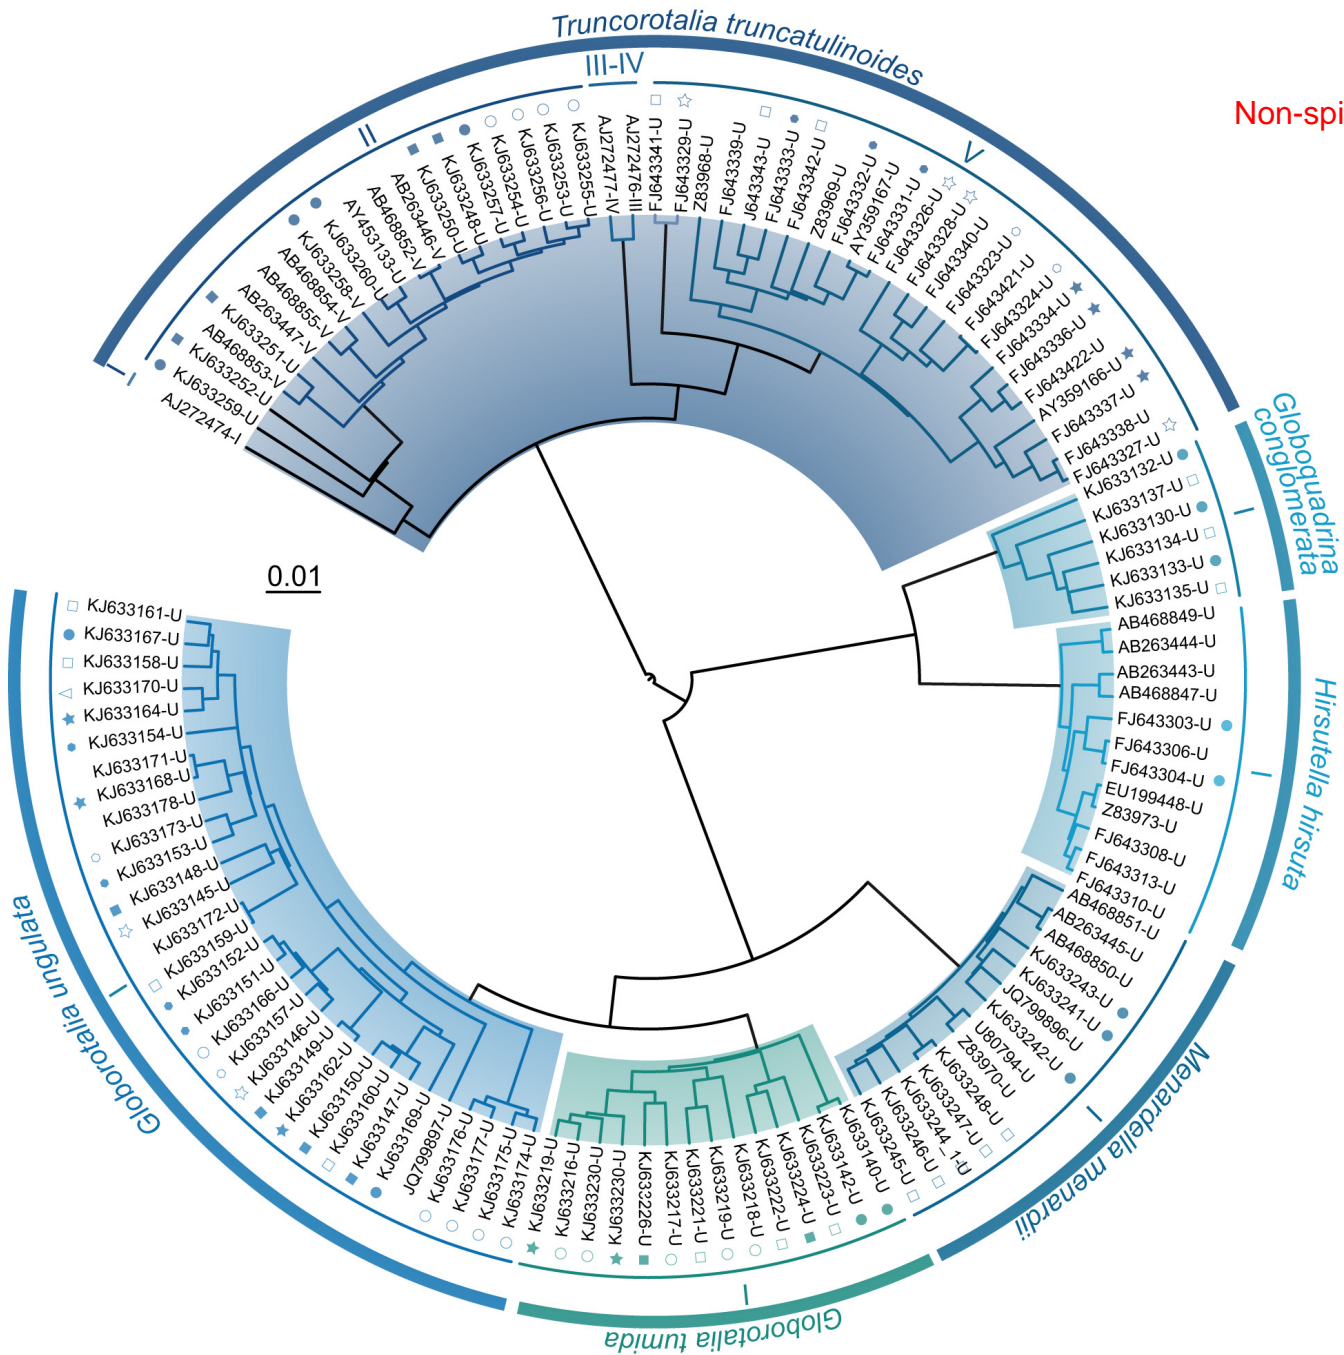

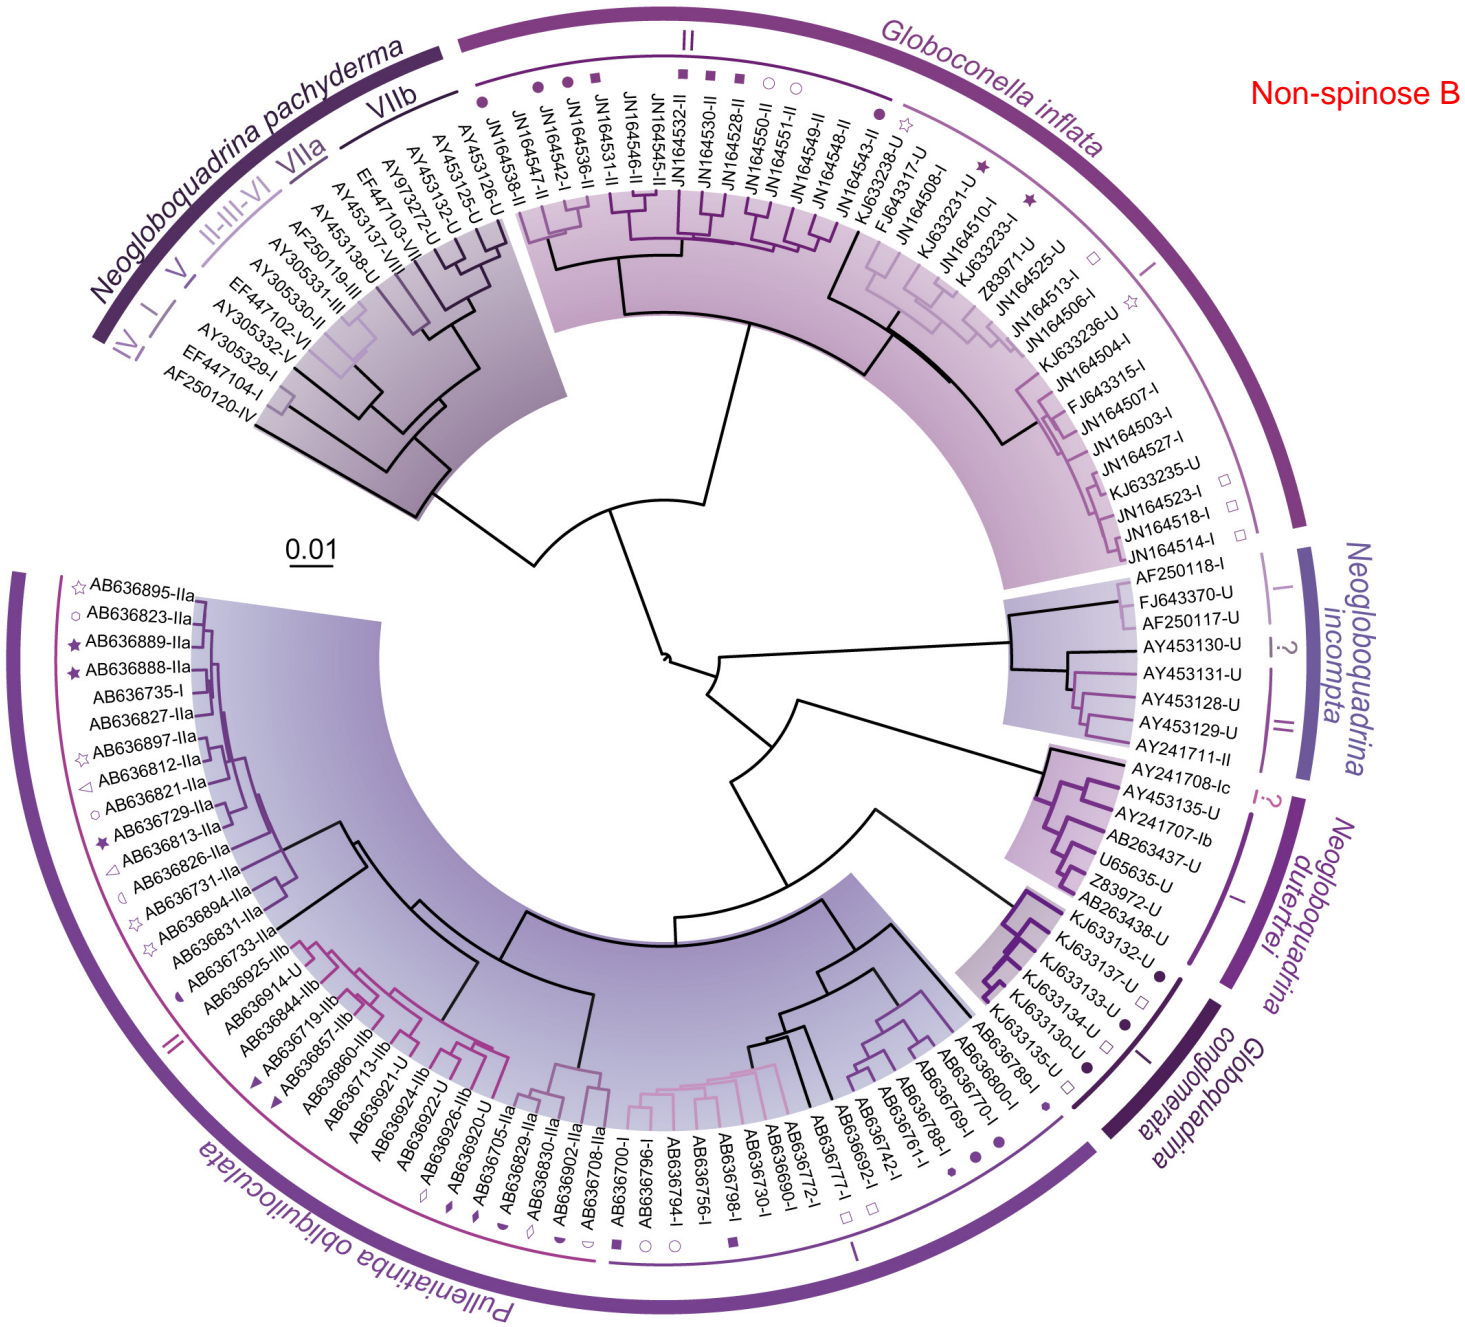

Microperforates

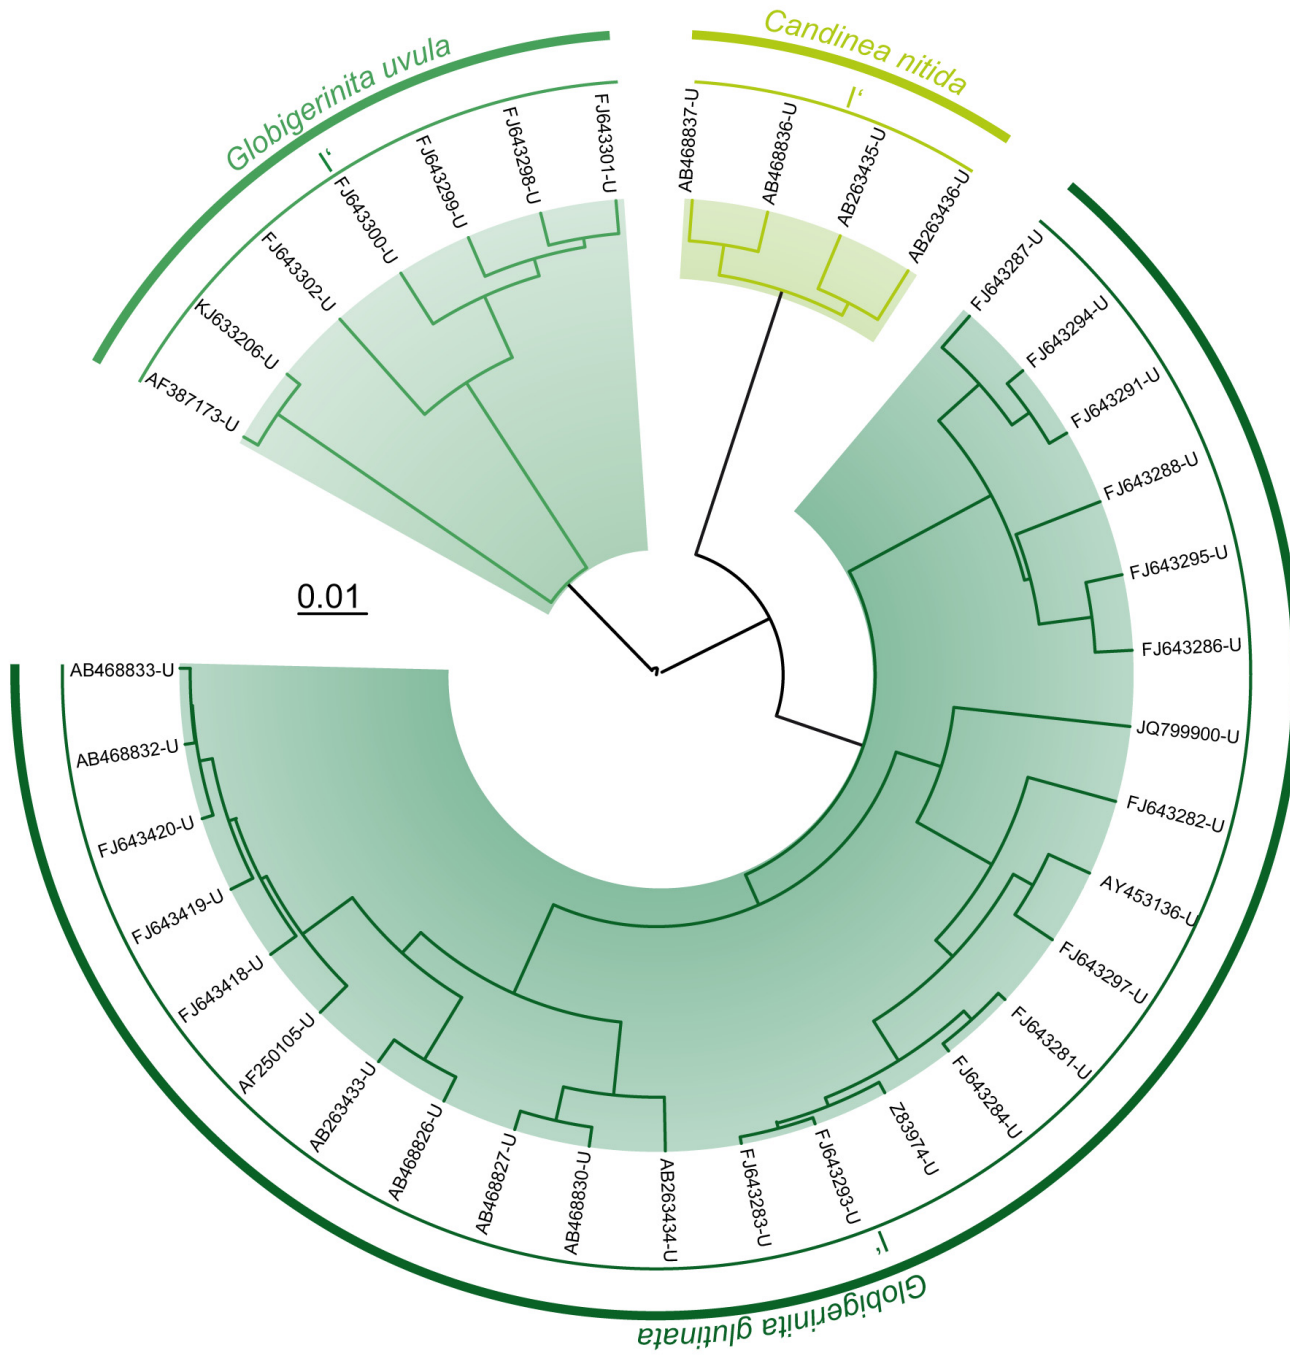

Supplement: pone.0104641.s001.pdf [file pone.0104641.s001.pdf]
